# Supplementary material for: Prevalence and Self-Perceived Experiences With the Use of Hormonal Contraceptives Among Competitive Female Cross-Country Skiers and Biathletes in Norway: The FENDURA Project
Source: PubMed Central journal article supplement (PMC9047044; doi:10.3389/fspor.2022.873222), 2022-04-14
Supplement: Table_1.pdf [file Table_1.pdf]

## *Supplementary Material*

**Supplementary Table 1.** The questions have been translated into English for readability but have not been validated in English.

| <b>Questions</b>                                                                                                          | <b>Answer options</b>                                                                                                                                                                                                                                                 |
|---------------------------------------------------------------------------------------------------------------------------|-----------------------------------------------------------------------------------------------------------------------------------------------------------------------------------------------------------------------------------------------------------------------|
| 1. Are you using any form of hormonal contraceptive?                                                                      | <ul style="list-style-type: none"> <li>- Yes</li> <li>- No</li> </ul>                                                                                                                                                                                                 |
| 2. Which delivery method do you use?                                                                                      | <ul style="list-style-type: none"> <li>- Combined OCs</li> <li>- Mini pills (progestin-only OCs)</li> <li>- Vaginal rings</li> <li>- Injections</li> <li>- Transdermal patches</li> <li>- Implants</li> <li>- Intrauterine systems (IUSs)</li> <li>- Other</li> </ul> |
| 3. What is the name of the product/brand that you use?                                                                    | <ul style="list-style-type: none"> <li>- Open-ended</li> </ul>                                                                                                                                                                                                        |
| 4. Do you use hormonal contraceptive for reasons other than contraception?                                                | <ul style="list-style-type: none"> <li>- Yes</li> <li>- No</li> </ul>                                                                                                                                                                                                 |
| 5. If yes, please specify which reasons                                                                                   | <ul style="list-style-type: none"> <li>- Open-ended</li> </ul>                                                                                                                                                                                                        |
| 6. Have you stopped using a hormonal contraceptive because it negatively influenced your physical fitness or performance? | <ul style="list-style-type: none"> <li>- Yes</li> <li>- No</li> </ul>                                                                                                                                                                                                 |
| 7. If yes, please specify why                                                                                             | <ul style="list-style-type: none"> <li>- Open-ended</li> </ul>                                                                                                                                                                                                        |
| 8. Do you experience any positive influence associated with exercise by using hormonal contraceptive?                     | <ul style="list-style-type: none"> <li>- Yes</li> <li>- No</li> </ul>                                                                                                                                                                                                 |
| 9. If yes, please specify how                                                                                             | <ul style="list-style-type: none"> <li>- Open-ended</li> </ul>                                                                                                                                                                                                        |
| 10. Do you experience any negative influence associated with exercise by using hormonal contraceptive?                    | <ul style="list-style-type: none"> <li>- Yes</li> <li>- No</li> </ul>                                                                                                                                                                                                 |
| 11. If yes, please specify how                                                                                            | <ul style="list-style-type: none"> <li>- Open-ended</li> </ul>                                                                                                                                                                                                        |

Supplementary Material

|                                                                                                           |                                                                                                                                                                      |
|-----------------------------------------------------------------------------------------------------------|----------------------------------------------------------------------------------------------------------------------------------------------------------------------|
| 12. Do you experience any positive influence associated with performance by using hormonal contraceptive? | <ul style="list-style-type: none"> <li>- Yes</li> <li>- No</li> </ul>                                                                                                |
| 13. If yes, please specify how                                                                            | <ul style="list-style-type: none"> <li>- Open-ended</li> </ul>                                                                                                       |
| 14. Do you experience any negative influence associated with performance by using hormonal contraceptive? | <ul style="list-style-type: none"> <li>- Yes</li> <li>- No</li> </ul>                                                                                                |
| 15. If yes, please specify how                                                                            | <ul style="list-style-type: none"> <li>- Open-ended</li> </ul>                                                                                                       |
| 16. Do you have regular bleedings?                                                                        | <ul style="list-style-type: none"> <li>- Yes</li> <li>- No</li> <li>- Yes, but use hormonal contraceptives</li> <li>- No, but use hormonal contraceptives</li> </ul> |
| 17. Do you experience any negative symptoms related to your hormonal contraceptive cycle/menstrual cycle? | <ul style="list-style-type: none"> <li>- Yes</li> <li>- No</li> <li>- I don't know</li> </ul>                                                                        |
| 18. If yes, please specify which negative symptoms and when these symptoms occur in your cycle            | <ul style="list-style-type: none"> <li>- Open-ended</li> </ul>                                                                                                       |

**Supplementary Table 2.** Prevalence of hormonal contraceptive use stratified by age and performance level.

|                        | <b>Juniors (n=51)</b> | <b>Seniors (n=62)</b> | <b><i>P</i>-value and Cramer's <i>V</i></b>    | <b>National team (n=30)</b> | <b>Non-national team (n=83)</b> | <b><i>P</i>-value and Cramer's <i>V</i></b>    |
|------------------------|-----------------------|-----------------------|------------------------------------------------|-----------------------------|---------------------------------|------------------------------------------------|
| Hormonal contraceptive | 30 (58.8%)            | 47 (75.8%)            | <i>P</i> = 0.054,<br>Cramer's <i>V</i> = 0.181 | 21 (70.0%)                  | 56 (67.5%)                      | <i>P</i> = 0.799,<br>Cramer's <i>V</i> = 0.024 |
| Progestin-only         | 18 (60.0%)            | 31 (66.0%)            | <i>P</i> = 0.596,<br>Cramer's <i>V</i> = 0.060 | 10 (47.6%)                  | 39 (69.6%)                      | <i>P</i> = 0.074,<br>Cramer's <i>V</i> = 0.204 |
| Combined               | 12 (40.0%)            | 16 (34.0%)            |                                                | 11 (52.4%)                  | 17 (30.4%)                      |                                                |

**Supplementary Table 3.** Reasons for hormonal contraceptive (HC) use and self-perceived influence of HC on training and/or performance stratified by age, performance level, and type of HC.

| <b>Reasons for HC use</b>                                      |                           |                           |                                       |                                 |                                     |                                       |                                   |                            |                                       |                                    |
|----------------------------------------------------------------|---------------------------|---------------------------|---------------------------------------|---------------------------------|-------------------------------------|---------------------------------------|-----------------------------------|----------------------------|---------------------------------------|------------------------------------|
| <b>HC users</b>                                                | <b>Juniors<br/>(n=30)</b> | <b>Seniors<br/>(n=47)</b> | <b>P-value and<br/>Cramer's V</b>     | <b>National<br/>team (n=21)</b> | <b>Non-national<br/>team (n=56)</b> | <b>P-value and<br/>Cramer's V</b>     | <b>Progestin-<br/>only (n=49)</b> | <b>Combined<br/>(n=28)</b> | <b>P-value and<br/>Cramer's V</b>     | <b>All HC<br/>users<br/>(n=77)</b> |
| Use HC for non-contraceptive reasons                           | 23<br>(76.7%)             | 23<br>(48.9%)             | $P = 0.016$ ,<br>Cramer's $V = 0.276$ | 13<br>(61.9%)                   | 33<br>(58.9%)                       | $P = 0.813$ ,<br>Cramer's $V = 0.027$ | 25<br>(51.0%)                     | 21<br>(75.0%)              | $P = 0.039$ ,<br>Cramer's $V = 0.235$ | 46<br>(59.7%)                      |
| Symptoms                                                       | 14<br>(60.9%)             | 15<br>(65.2%)             | $P = 0.760$ ,<br>Cramer's $V = 0.045$ | 9<br>(69.2%)                    | 20<br>(60.6%)                       | $P = 0.739$ ,<br>Cramer's $V = 0.080$ | 15<br>(60.0%)                     | 14<br>(66.7%)              | $P = 0.762$ ,<br>Cramer's $V = 0.069$ | 29<br>(63.0%)                      |
| Practical                                                      | 13<br>(56.5%)             | 8<br>(34.9%)              | $P = 0.139$ ,<br>Cramer's $V = 0.218$ | 4<br>(30.8%)                    | 17<br>(51.5%)                       | $P = 0.203$ ,<br>Cramer's $V = 0.188$ | 10<br>(40.0%)                     | 11<br>(52.4%)              | $P = 0.553$ ,<br>Cramer's $V = 0.124$ | 21<br>(46.0%)                      |
| Compound reasons                                               | 7<br>(30.4%)              | 6<br>(26.1%)              | $P = 0.743$ ,<br>Cramer's $V = 0.048$ | 5<br>(38.5%)                    | 8<br>(24.2%)                        | $P = 0.469$ ,<br>Cramer's $V = 0.142$ | 4<br>(16.0%)                      | 9<br>(42.9%)               | $P = 0.056$ ,<br>Cramer's $V = 0.297$ | 13<br>(28.0%)                      |
| Health                                                         | 3<br>(13.0%)              | 3<br>(13.0%)              | Low n                                 | 1<br>(7.7%)                     | 5<br>(15.2%)                        | Low n                                 | 2<br>(8.0%)                       | 4<br>(19.0%)               | Low n                                 | 6<br>(13.0%)                       |
| <b>Self-perceived influence on training and/or performance</b> |                           |                           |                                       |                                 |                                     |                                       |                                   |                            |                                       |                                    |
| <b>HC users</b>                                                | <b>Juniors<br/>(n=30)</b> | <b>Seniors<br/>(n=47)</b> | <b>P-value and<br/>Cramer's V</b>     | <b>National<br/>team (n=21)</b> | <b>Non-national<br/>team (n=56)</b> | <b>P-value and<br/>Cramer's V</b>     | <b>Progestin-<br/>only (n=49)</b> | <b>Combined<br/>(n=28)</b> | <b>P-value and<br/>Cramer's V</b>     | <b>All HC<br/>users<br/>(n=77)</b> |
| Solely positive                                                | 16<br>(53.3%)             | 22<br>(46.8%)             |                                       | 12<br>(57.1%)                   | 26<br>(46.4%)                       |                                       | 25<br>(51.0%)                     | 13<br>(46.4%)              |                                       | 38<br>(49.4%)                      |
| Neutral                                                        | 10<br>(33.3%)             | 14<br>(29.8%)             | $P = 0.788$ ,<br>Cramer's $V = 0.124$ | 4<br>(19.0%)                    | 20<br>(35.7%)                       | $P = 0.379$ ,<br>Cramer's $V = 0.189$ | 14<br>(28.6%)                     | 10<br>(35.7%)              | $P = 0.942$ ,<br>Cramer's $V = 0.088$ | 24<br>(31.2%)                      |
| Mixed                                                          | 3<br>(10.0%)              | 8<br>(17.0%)              |                                       | 3<br>(14.3%)                    | 8<br>(14.3%)                        |                                       | 7<br>(14.3%)                      | 4<br>(14.3%)               |                                       | 11<br>(14.3%)                      |
| Solely negative                                                | 1<br>(3.3%)               | 3<br>(6.4%)               |                                       | 2<br>(9.5%)                     | 2<br>(3.6%)                         |                                       | 3<br>(6.1%)                       | 1<br>(3.6%)                |                                       | 4<br>(5.2%)                        |

**Supplementary Table 4.** Regular withdrawal bleeding/menstruation and symptoms, stratified by age, performance level, type of HC, as well as all HC users and non-HC users.

| HC users                          | Juniors<br>(n=30) | Seniors<br>(n=47) | <i>P</i> -value<br>and<br>Cramer's<br><i>V</i>    | National<br>team<br>(n=21) | Non-<br>national<br>team<br>(n=56) | <i>P</i> -value<br>and<br>Cramer's <i>V</i>       | Progestin-<br>only<br>(n=49) | Combined<br>(n=28) | <i>P</i> -value<br>and<br>Cramer's<br><i>V</i>    | All athletes                                       | All HC<br>users<br>(n=77) | Non-HC<br>users<br>(n=36) | <i>P</i> -value and<br>Cramer's <i>V</i>          |
|-----------------------------------|-------------------|-------------------|---------------------------------------------------|----------------------------|------------------------------------|---------------------------------------------------|------------------------------|--------------------|---------------------------------------------------|----------------------------------------------------|---------------------------|---------------------------|---------------------------------------------------|
| Regular<br>withdrawal<br>bleeding | 14<br>(46.7%)     | 22<br>(46.8%)     | <i>P</i> = 0.990,<br>Cramer's<br><i>V</i> = 0.001 | 12<br>(57.1%)              | 24<br>(42.9%)                      | <i>P</i> = 0.263,<br>Cramer's <i>V</i><br>= 0.128 | 15<br>(30.6%)                | 21<br>(75.0%)      | <i>P</i> < 0.001,<br>Cramer's<br><i>V</i> = 0.428 | Regular<br>withdrawal<br>bleeding/<br>menstruation | 36<br>(46.8%)             | 29<br>(80.6%)             | <i>P</i> < 0.001,<br>Cramer's <i>V</i><br>= 0.319 |
|                                   |                   |                   |                                                   |                            |                                    |                                                   | Progestin-<br>only<br>(n=15) | Combined<br>(n=21) |                                                   |                                                    | All HC<br>users<br>(n=36) | Non-HC<br>users<br>(n=29) |                                                   |
| Report<br>symptoms                |                   |                   |                                                   |                            |                                    |                                                   | 12<br>(80.0%)                | 18<br>(85.7%)      | <i>P</i> = 0.785,<br>Cramer's<br><i>V</i> = 0.200 | Report<br>symptoms                                 | 30<br>(83.3%)             | 25<br>(86.2%)             | <i>P</i> = 1.000,<br>Cramer's <i>V</i><br>= 0.112 |
